# Supplementary figures and images for: Early detection of bacteria using SPR imaging and event counting: experiments withListeria monocytogenesandListeria innocua
Source: Royal Society of Chemistry journal article supplement (doi:10.1039/c9ra01466g), 2019-01-01

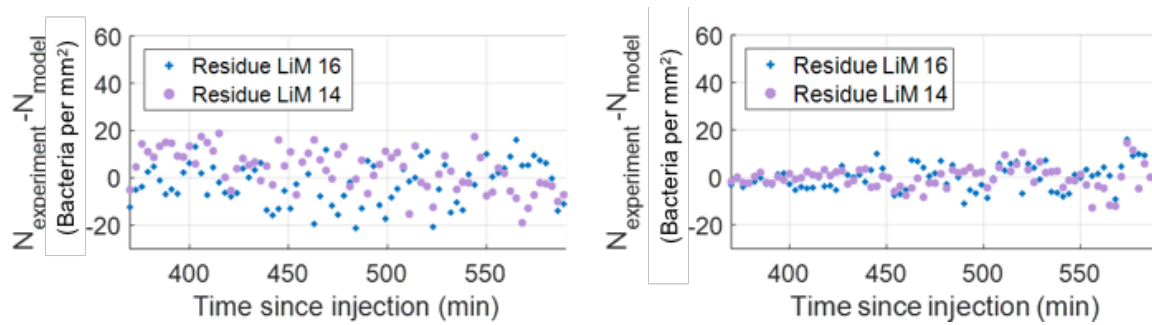

Residuals of the modeling presented on Figure 3 a. and b. showing an even repartition around zero

Supplement: c9ra01466g1.pdf [file c9ra01466g1.pdf]
